# Impact of non-alcoholic fatty liver disease and smoking on colorectal polyps

Qin-Fen Chen<sup>1,\*</sup>, Xiao-Dong Zhou<sup>2,\*</sup>, Dan-Hong Fang<sup>3</sup>, Yang-Jie Sun<sup>1</sup>, Qian Zhao<sup>1</sup>, Jun-Hua Huang<sup>1</sup>, Yin Jin<sup>1</sup> and Jian-Sheng Wu<sup>3</sup>

<sup>1</sup>Department of Gastroenterology, First Affiliated Hospital of Wenzhou Medical University, Wenzhou 325000, China

<sup>2</sup>Department of Cardiovascular Medicine, First Affiliated Hospital of Wenzhou Medical University, Wenzhou 325000, China

<sup>3</sup>Medical and Health Care Center, First Affiliated Hospital of Wenzhou Medical University, Wenzhou 325000, China

\* Co-first author

**Correspondence to:** Jian-Sheng Wu, **email:** wenzhouwujs@163.com, wzwujs@wzhospital.cn

**Keywords:** colorectal polyps, smoking, non-alcoholic fatty liver disease, health check

**Received:** February 27, 2017

**Accepted:** July 25, 2017

**Published:** August 24, 2017

**Copyright:** Chen et al. This is an open-access article distributed under the terms of the Creative Commons Attribution License 3.0 (CC BY 3.0), which permits unrestricted use, distribution, and reproduction in any medium, provided the original author and source are credited.

## ABSTRACT

**Objectives:** Non-alcoholic fatty liver disease (NAFLD) and smoking have similar mechanisms of promoting colorectal polyps. The potential link between NAFLD and smoking in men and colorectal polyps has not been adequately evaluated. The aim is to investigate this association.

**Methods:** A retrospective cross-sectional study was conducted on 2409 individuals undergoing a health check. Univariate and multivariate logistic regression were performed for analyzing the association between risk factors and colorectal polyps. Individuals were divided into four groups: Q1: NAFLD (-)/smoking (-); Q2: NAFLD (+)/smoking (-); Q3: NAFLD (-)/smoking (+); Q4: NAFLD (+)/smoking (+). Logistic analyses were used to explore associations for the whole study population and stratified groups.

**Results:** The prevalence of colorectal polyps was 38.8% in males, and that of colorectal polyps in smokers and individuals with NAFLD were 47.0% (428/911) and 42.9% (267/622), respectively. With Q1 as reference, subjects with NAFLD (+) and smoking habits (+) had the highest ORs for colorectal polyps (OR = 2.64, 95% CI: 1.91 - 3.64, P < 0.001), adenomatous polyps (OR = 2.06, 95% CI: 1.38 - 3.05, P < 0.05), non-adenomatous polyps (OR = 1.97, 95% CI: 1.39 - 2.80, P < 0.05),  $\geq 3$  polyps (OR = 2.05, 95% CI: 1.31 - 3.22, P < 0.05) and proximal polyps (OR = 1.58, 95% CI: 1.02 - 2.45, P < 0.05) after adjusting for confounding variables.

**Conclusions:** Men with NAFLD and smoking habits have an increasing risk of colorectal polyps.

## INTRODUCTION

Colorectal cancer is regarded as one of the most common human malignancies and the second leading cause of cancer-related death worldwide [1–3]. Colon polyps may transform into carcinoma due to genetic mutations [4]. The incidence of colorectal polyps has been rising dramatically over the past decades [5]. Colonoscopy

and polypectomy are considered efficient methods to detect colorectal polyps and decrease the incidence of cancer [6]. Accumulating evidence has demonstrated that common risk factors, such as male gender, age, family history, metabolic syndrome (MS), insulin resistance, non-alcoholic fatty liver disease (NAFLD), smoking, alcohol consumption, diet and lifestyle contribute to the development of colorectal polyps [7–9].

Studies describing the mechanisms underlying the association between various risk factors and colorectal polyps are abundant and complex. The crucial role of insulin resistance and chronic inflammation in the occurrence and carcinogenesis of colorectal polyps has been reported in several experimental and observational studies [8, 10–13]. Bu-Tian Ji et al. demonstrated that smoking significantly increases the risk of both hyperplastic and adenomatous polyps [14]. The possible mechanisms by which colorectal polyps arise in individuals who smoke comprise insulin resistance, inflammation and oxidative stress [13, 15]. Moreover, NAFLD has been revealed as a risk factor for the prevalence of colorectal adenomatous polyps by several cohort studies [16, 17]. It is generally recognized that chronic inflammatory state and insulin resistance have crucial roles in the development of NAFLD [16]. Consequently, a similar mechanism may be involved behind the increase in the prevalence of colorectal polyps in the presence of NAFLD and smoking.

Men with NAFLD and smoking habits should be carefully monitored for the incidence of colorectal polyps. A cohort study by Claudia et al. reported that 1091 NAFLD patients enrolled in the non-alcoholic steatohepatitis clinical research network (NASH CRN) studies with liver biopsies exhibited accelerated progression of liver disease in the presence of smoking [18]. A recent cross-sectional study reported that smoking habit and fatty liver had a synergistic effect on MS, and the risk of MS increased by 9.5-fold in smokers with fatty livers relative to non-smoke without fatty livers [19]. NAFLD and smoking in men (NSM) may increase the prevalence of colorectal polyps. However, the association between NSM and colorectal polyps remains unknown. According to a cross-sectional survey of tobacco use among adults in China, which was carried out by the Global Adult Tobacco Survey (GATS), only 2.4% of women were smokers, whereas 52.9% of men were smokers [20].

Therefore, the primary focus of the present study was to explore the association between NSM and colorectal polyps and provide evidence for the early detection of colorectal polyps.

## RESULTS

### Subject characteristics

The demographics and clinical features of 2409 eligible participants are shown in Table 1. A total of 934 subjects were diagnosed with colorectal polyps. The prevalence of NAFLD in colorectal polyps group ( $n = 934$ ) and polyp-free group ( $n = 1475$ ) were 28.6% and 24.1%, respectively. The frequency of smoking was 45.8% in colorectal polyps group and 32.7% in polyp-free group. Subjects with polyps were older in age and had higher

weight, BMI, SBP, DBP, FPG, AKP,  $\gamma$ -GT and higher frequency of alcohol use.

### NAFLD and smoking are independent risk factors for colorectal polyps

Univariate and multivariate logistic regression analyses of the risk factors for colorectal polyps are presented in Table 2. Compared with the polyp-free group, the unadjusted ORs for colorectal polyps among variables were as follows: NAFLD (OR = 1.26, 95% CI: 1.05 - 1.52,  $P = 0.014$ ) and smoking (OR = 1.74, 95% CI: 1.47 - 2.06,  $P < 0.001$ ). All variables that were associated with colorectal polyps were identified as candidate variables in multivariate analysis. The results of multivariate analysis signified age (OR = 2.63, 95% CI: 2.19 - 3.15,  $P < 0.001$ ), smoking (OR = 1.83, 95% CI: 1.53 - 2.19,  $P < 0.001$ ), NAFLD (OR = 1.33, 95% CI: 1.08 - 1.64,  $P = 0.007$ ), obesity (OR = 1.15, 95% CI: 0.96 - 1.39,  $P = 0.130$ ), hypertension (OR = 1.10, 95% CI: 0.90 - 1.34,  $P = 0.349$ ), hyperglycemia (OR = 0.95, 95% CI: 0.70 - 1.29,  $P = 0.754$ ) and alcohol use (OR = 1.28, 95% CI: 1.04 - 1.57,  $P = 0.020$ ) after adjustment for age, smoking, NAFLD, obesity, hypertension, hyperglycemia and alcohol use. The prevalence of colorectal polyps in smokers and individuals with NAFLD were 47.0% and 42.9%, respectively. Furthermore, significant association was found between NSM and colorectal polyps after controlling for possible confounders.

### The association between NSM and colorectal polyps

To obtain a deeper understanding of the association between NSM and colorectal polyps, individuals were divided into four groups (Q1, Q2, Q3 and Q4) according to the different statuses of NAFLD and smoking. The baseline characteristics of NAFLD and smoking status in men are shown in Supplementary Table 1. The prevalence for colorectal polyps was 32.1%, 38.3%, 45.6%, and 51.4% for individuals in Q1, Q2, Q3 and Q4, respectively. In addition, the association between NSM and colorectal polyps is shown in Table 3. In Model C, with the Q1 group as reference, the adjusted ORs for Q2, Q3 and Q4 were 1.47 (95% CI: 1.13 - 1.91,  $P = 0.004$ ), 1.91 (95% CI: 1.55 - 2.37,  $P < 0.001$ ) and 2.64 (95% CI: 1.91 - 3.64,  $P < 0.001$ ), respectively.

### Stratified analysis

The analysis conducted according to the presence, type (polyp-free, adenomatous and non-adenomatous), location, size and number of colorectal polyps is shown in Table 4. In comparison with subjects in the NAFLD (-) and smoking (-) group, subjects in the NAFLD (+) and smoking (+) group had significantly increased ORs for

**Table 1: Baseline characteristics between polyp-free group and colorectal polyps group in men**

| Variables                    | Polyp-free               | Colorectal polyps        | P-value |
|------------------------------|--------------------------|--------------------------|---------|
|                              | n=1475 (61.8%)           | n=934 (38.8%)            |         |
| Age (years)                  | 44.65 ± 9.89             | 50.20 ± 9.70             | <0.001  |
| Weight (kg)                  | 69.48 ± 10.18            | 70.87 ± 10.22            | 0.001   |
| Height (cm)                  | 169.13 ± 5.57            | 168.87 ± 5.81            | 0.272   |
| BMI (kg/m <sup>2</sup> )     | 24.28 ± 3.22             | 24.81 ± 3.06             | <0.001  |
| SBP (mmHg)                   | 127.29 ± 16.25           | 130.50 ± 17.85           | <0.001  |
| DBP (mmHg)                   | 76.43 ± 11.75            | 78.16 ± 12.06            | 0.001   |
| FPG (mmol/L)                 | 4.86 ± 1.27              | 5.06 ± 1.49              | <0.001  |
| TG (mmol/L)                  | 2.14 ± 2.05              | 2.15 ± 1.96              | 0.953   |
| TC (mmol/L)                  | 5.42 ± 1.16              | 5.42 ± 1.13              | 0.978   |
| HDL-C (mmol/L)               | 1.22 ± 0.28              | 1.22 ± 0.29              | 0.864   |
| LDL-C (mmol/L)               | 3.27 ± 0.86              | 3.26 ± 0.84              | 0.772   |
| ALT (IU/L)                   | 34.77 ± 33.71            | 35.19 ± 29.29            | 0.758   |
| AST (IU/L)                   | 29.03 ± 17.88            | 30.13 ± 18.98            | 0.153   |
| AKP (IU/L)                   | 77.48 ± 20.02            | 79.88 ± 24.41            | 0.013   |
| γ-GT (IU/L)                  | 57.61 ± 101.8            | 65.86 ± 79.17            | 0.037   |
| ALB (g/L)                    | 45.38 ± 3.16             | 44.85 ± 3.22             | <0.001  |
| H. pylori n (%) <sup>a</sup> | 699 (50.1%) <sup>a</sup> | 450 (50.9%) <sup>a</sup> | 0.723   |
| Alcohol n (%)                | 288 (19.5%)              | 260 (27.8%)              | <0.001  |
| NAFLD n (%)                  | 355 (24.1%)              | 267 (28.6%)              | 0.015   |
| Smoking n (%)                | 483 (32.7%)              | 428 (45.8%)              | <0.001  |

BMI: body mass index; SBP: systolic blood pressure; DBP: diastolic blood pressure; FPG: fasting plasma glucose; TG: triglyceride; TC: total cholesterol; HDL-C: high density lipoprotein-cholesterol; LDL-C: low density lipoprotein-cholesterol; ALT: alanine aminotransferase; AST: aspartate aminotransferase; AKP: alkaline phosphatase; γ-GT: γ-Glutamyltransferase; ALB: albumin; H.pylori: helicobacter pylori; NAFLD: non-alcoholic fatty liver disease.

<sup>a</sup>: data are extracted from 2278 subjects.

adenomatous polyps (OR = 2.06, 95% CI: 1.38 - 3.05, P < 0.05), non-adenomatous polyps (OR = 1.97, 95% CI: 1.39 - 2.80, P < 0.05), polyps number ≥ 3 (OR = 2.05, 95% CI: 1.31 - 3.22, P < 0.05) and proximal polyps (OR = 1.58, 95% CI: 1.02 - 2.45, P < 0.05). Furthermore, individuals in the NAFLD (+) and smoking (-) group had higher ORs of adenomatous polyps (OR = 1.49, 95% CI: 1.06 - 2.09, P < 0.05), polyp size of 5 -10 mm (OR = 1.50, 95% CI: 1.03 - 2.17, P < 0.05) and bilateral polyps (OR = 1.61, 95% CI: 1.06 - 2.45, P < 0.05). Individuals in the NAFLD (-) and smoking (+) group had higher ORs for adenomatous polyps (OR = 1.33, 95% CI: 1.01 - 1.76, P < 0.05) and non-adenomatous polyps (OR = 1.86, 95% CI: 1.47 - 2.36, P < 0.05).

## DISCUSSION

The present study is the first to investigate the possible association of NSM and colorectal polyps. In our study, after controlling for confounding factors, the ORs for colorectal polyps in male individuals with a history of smoking and NAFLD were higher compared to individuals of the Q1 group. Furthermore, in the Q4 group, the ORs for adenomatous polyps (OR = 2.06), non-adenomatous polyps (OR = 1.97), ≥ 3 polyp number (OR = 2.05) and proximal polyps (OR = 1.58) remained higher than those in the other groups. Thus, our study demonstrated that men with NAFLD and a history of smoking have a higher risk for colorectal polyps, especially proximal polyps and multiple polyps (greater than or equal to 3).

**Table 2: Univariate and multivariate analysis of risk factors for colorectal polyps in men**

|                      | Polyp-free<br>n=1475 | Colorectal polyps<br>n=934 | Crude OR<br>(95% CI) | P-value | Adjusted OR<br>(95% CI) | P-value |
|----------------------|----------------------|----------------------------|----------------------|---------|-------------------------|---------|
| <b>Age (year)</b>    |                      |                            |                      |         |                         |         |
| < 50                 | 1046 (70.9%)         | 456 (48.8%)                | 1                    |         | 1                       |         |
| ≥50                  | 429 (29.1%)          | 478 (51.2%)                | 2.56 (2.16 - 3.03)   | <0.001  | 2.63 (2.19 - 3.15)      | <0.001  |
| <b>Smoking</b>       |                      |                            |                      |         |                         |         |
| No                   | 992 (67.3%)          | 506 (54.2%)                | 1                    |         | 1                       |         |
| Yes                  | 483 (32.7%)          | 428 (45.8%)                | 1.74 (1.47 - 2.06)   | <0.001  | 1.83 (1.53 - 2.19)      | <0.001  |
| <b>NAFLD</b>         |                      |                            |                      |         |                         |         |
| No                   | 1120 (75.9%)         | 667 (71.4%)                | 1                    |         | 1                       |         |
| Yes                  | 355 (24.1%)          | 267 (28.6%)                | 1.26 (1.05 - 1.52)   | 0.014   | 1.33 (1.08 - 1.64)      | 0.007   |
| <b>Obesity</b>       |                      |                            |                      |         |                         |         |
| No                   | 859 (58.3%)          | 491 (52.7%)                | 1                    |         | 1                       |         |
| Yes                  | 614 (41.7%)          | 441 (47.3%)                | 1.26 (1.07 - 1.48)   | 0.007   | 1.15 (0.96 - 1.39)      | 0.130   |
| <b>Hypertension</b>  |                      |                            |                      |         |                         |         |
| No                   | 1104 (74.8%)         | 644 (69.0%)                | 1                    |         | 1                       |         |
| Yes                  | 371 (25.2%)          | 289 (31.0%)                | 1.34 (1.11 - 1.60)   | 0.002   | 1.10 (0.90 - 1.34)      | 0.349   |
| <b>Hyperglycemia</b> |                      |                            |                      |         |                         |         |
| No                   | 1335 (92.2%)         | 823 (89.7%)                | 1                    |         | 1                       |         |
| Yes                  | 113 (7.8%)           | 95 (10.3%)                 | 1.36 (1.02 - 1.82)   | 0.034   | 0.95 (0.70 - 1.29)      | 0.754   |
| <b>Dyslipidemia</b>  |                      |                            |                      |         |                         |         |
| No                   | 647 (44.9%)          | 396 (43.3%)                | 1                    |         | 1                       |         |
| Yes                  | 795 (55.1%)          | 518 (56.7%)                | 1.07 (0.90 - 1.26)   | 0.463   |                         |         |
| <b>Alcohol</b>       |                      |                            |                      |         |                         |         |
| No                   | 1187 (80.5%)         | 674 (72.2%)                | 1                    |         | 1                       |         |
| Yes                  | 288 (19.5%)          | 260 (27.8%)                | 1.59 (1.31 - 1.93)   | <0.001  | 1.28 (1.04 - 1.57)      | 0.020   |

Adjusted for age, smoking, NAFLD, obesity, hypertension, hyperglycemia and alcohol.  
 NAFLD: non-alcoholic fatty liver disease.

A number of previous reports have suggested that NAFLD and smoking are risk factors for colorectal adenomatous polyps and neoplasms [9, 14, 16, 17, 21]. In agreement with previous studies, our study showed significant associations between NAFLD, smoking and the presence of colorectal polyps.

Over the past two decades, many epidemiologic studies have demonstrated that smoking was associated with an increased risk for colorectal hyperplastic polyps and adenomatous polyps [9, 14]. Tobacco use is regarded as a key determinant of adenoma risk, and smoking may be important for both formation and aggressiveness of adenomas [22]. Several retrospective cohort studies have

**Table 3: Prevalence and ORs of colorectal polyps among different NAFLD and smoking status in men**

|    | Colorectal polyps | Model A            | P-value | Model B            | P      | Model C            | P-value |
|----|-------------------|--------------------|---------|--------------------|--------|--------------------|---------|
| Q1 | 352/1096 (32.1%)  | 1                  | -       | 1                  | -      | 1                  | -       |
| Q2 | 154/402 (38.3%)   | 1.31 (1.04 - 1.67) | 0.025   | 1.49 (1.16 - 1.91) | 0.002  | 1.47 (1.13 - 1.91) | 0.004   |
| Q3 | 315/691 (45.6%)   | 1.77 (1.46 - 2.16) | <0.001  | 1.88 (1.53 - 2.32) | <0.001 | 1.91 (1.55 - 2.37) | <0.001  |
| Q4 | 113/220 (51.4%)   | 2.23 (1.67 - 2.99) | <0.001  | 2.63 (1.93 - 3.58) | <0.001 | 2.64 (1.91 - 3.64) | <0.001  |

Model A is univariate analysis.

Model B is adjusted for age and alcohol.

Model C is adjusted for age, obesity, hypertension, hyperglycemia, dyslipidemia and alcohol.

Q1: NAFLD (-)/Smoking (-); Q2: NAFLD (+)/Smoking (-); Q3: NAFLD (-)/Smoking (+); Q4: NAFLD (+)/Smoking (+).

demonstrated a significant relationship between NAFLD and colorectal polyps [16, 17, 21]. The exact mechanism behind the increase in colorectal polyps induced by NSM remains unclear, but the potential factors suggested include oxidative stress, chronic inflammation and insulin resistance [8, 10–13].

Chronic inflammation is a well-known mechanism in the development of colorectal polyps. Cigarette smoking is known to increase inflammatory biomarkers, cause oxidative stress and exert pro-inflammatory effects in many organs, such as diabetic nephropathy, pancreatitis, hepatic steatosis and gastrointestinal mucosal diseases [23–26]. Furthermore, experimental studies have demonstrated that plasma inflammatory biomarkers, such as C-reactive protein, reactive oxygen species, plasma fibrinogen, interleukin-6, tumor necrosis factor- $\alpha$  and plasminogen activator inhibitor-1 are elevated in individuals with NAFLD [16, 27, 28]. These inflammatory biomarkers inhibit cell apoptosis and promote cell proliferation, angiogenesis and metastasis, which may partly explain the formation of colorectal polyps in men with NAFLD and smoking habit [16, 29, 30].

The role of insulin resistance in colorectal polyps is well recognized [31]. Cigarette smoking has been known to decrease insulin sensitivity by increasing insulin-antagonistic hormones (catecholamine, cortisol and growth hormone) [32]. Insulin resistance plays a crucial role in the pathophysiology of NAFLD and colorectal polyps [13, 18, 31]. Several experimental studies reported that insulin and the insulin-like growth factor (IGF) axis play an important role in cellular metabolism and growth [33]. The mechanism of insulin in stimulating the growth of colorectal cells has been described to be mediated by the increase in bioactive IGF-1 (which inhibits apoptosis and regulates cell cycle progression) through the regulation of hepatic growth hormone receptors and reduction of hepatic secretion of IGF binding protein-1 [34]. Smoking and NAFLD are closely related to insulin resistance, which is a risk factor for increasing the incidence of colorectal polyps [17, 22].

Our study has several limitations that need to be acknowledged. First, a high proportion of individuals

undergoing health checks were office workers with a sedentary lifestyle. This particular group might differ from the general Chinese population with regard to nutritional habits and physical exercise. Therefore, a bias could have been introduced. It is possible that lifestyle habits in this population, such as consumption of high calorie, high fat diets and physical exercise might differ from those in the general population. Second, this was a single center study with a small sample size. A multicenter study with a large sample size should be conducted to further corroborate the association in the next step. Third, although the standard criterion for diagnosis of NAFLD is liver biopsy, it is too invasive for use in routine health examinations. The diagnosis of fatty liver was based on ultrasound imaging with 94% sensitivity and 84% specificity [35].

In conclusion, our study demonstrated that NSM was positively correlated with the prevalence of colorectal polyps, which should pay more attention to colonoscopy examination in their routine physical checkup.

## MATERIALS AND METHODS

### Subjects

This retrospective cross-sectional study involved individuals who were participating in a routine clinical physical examination at the Medical and Health Care Center of the First Affiliated Hospital of Wenzhou Medical University from September 2014 to November 2016. All individuals underwent physical examination, laboratory testing and an interview on lifestyle, medical history and medication use with a standard questionnaire. A total of 6035 participants (3657 males and 2378 females) were screened. Among this large study group, 3626 participants met the study exclusion criteria: incomplete intestine preparation; incomplete colonoscopic examination; female; incidence of carcinoma, inflammatory bowel disease or chronic liver disease (viral, toxic and autoimmune liver diseases); alcohol consumption >140 g/week and missing relevant data (such as tobacco use and colonoscopies). The protocol followed the tenets of the Treaty of Helsinki.

**Table 4: Colonoscopic features in relation to the different NAFLD and smoking status in men**

|                              | Q1<br>n=1096 | Q2<br>n=402 | Q3<br>n=691 | Q4<br>n=220 | Q1 | Q2                  | Q3                  | Q4                  |
|------------------------------|--------------|-------------|-------------|-------------|----|---------------------|---------------------|---------------------|
| <b>Polyp-free</b>            | 744          | 248         | 376         | 107         | 1  | 0.68 (0.52 - 0.89)* | 0.52 (0.42 - 0.65)* | 0.38 (0.28 - 0.52)* |
| <b>Adenomaous polyps</b>     | 153          | 68          | 121         | 47          | 1  | 1.49 (1.06 - 2.09)* | 1.33 (1.01 - 1.76)* | 2.06 (1.38 - 3.05)* |
| <b>Non-adenomaous polyps</b> | 199          | 86          | 194         | 66          | 1  | 1.23 (0.91 - 1.66)  | 1.86 (1.47 - 2.36)* | 1.97 (1.39 - 2.80)* |
| <b>Polyp number</b>          |              |             |             |             |    |                     |                     |                     |
| <b>1</b>                     | 197          | 79          | 144         | 50          | 1  | 1.00 (0.74 - 1.35)  | 0.71 (0.55 - 0.92)* | 0.78 (0.52 - 1.15)  |
| <b>2</b>                     | 64           | 38          | 68          | 23          | 1  | 1.38 (0.90 - 2.11)  | 1.06 (0.73 - 1.53)  | 1.28 (0.75 - 2.18)  |
| <b>≥3</b>                    | 91           | 37          | 103         | 40          | 1  | 1.37 (0.92 - 2.04)  | 1.32 (0.96 - 1.82)  | 2.05 (1.31 - 3.22)* |
| <b>Size (mm)</b>             |              |             |             |             |    |                     |                     |                     |
| <b>&lt;5</b>                 | 231          | 95          | 195         | 67          | 1  | 1.06 (0.80 - 1.40)  | 0.90 (0.71 - 1.13)  | 1.14 (0.81 - 1.61)  |
| <b>5 - 10</b>                | 90           | 43          | 94          | 32          | 1  | 1.50 (1.03 - 2.17)* | 1.03 (0.74 - 1.42)  | 1.17 (0.72 - 1.89)  |
| <b>≥10</b>                   | 31           | 16          | 26          | 14          | 1  | 1.04 (0.54 - 1.99)  | 0.83 (0.48 - 1.42)  | 1.35 (0.64 - 2.84)  |
| <b>Location</b>              |              |             |             |             |    |                     |                     |                     |
| <b>Proximal polyps</b>       | 117          | 40          | 89          | 30          | 1  | 1.29 (0.89 - 1.87)  | 0.88 (0.64 - 1.21)  | 1.58 (1.02 - 2.45)* |
| <b>Distal polyps</b>         | 173          | 75          | 146         | 52          | 1  | 0.93 (0.68 - 1.26)  | 0.88 (0.68 - 1.13)  | 0.80 (0.54 - 1.19)  |
| <b>Bilateral polyps</b>      | 62           | 39          | 80          | 31          | 1  | 1.61 (1.06 - 2.45)* | 1.10 (0.77 - 1.57)  | 1.50 (0.88 - 2.55)  |

Adjusted for age, obesity, hypertension, hyperglycemia, dyslipidemia and alcohol.

Q1: NAFLD (-)/Smoking (-); Q2: NAFLD (+)/Smoking (-); Q3: NAFLD (-)/Smoking (+); Q4: NAFLD (+)/Smoking (+). Q1 group is as reference.

\*: P < 0.05.

## Measurements

The clinical research coordinators collected physical assessment data, including age, sex, height, weight, smoking, alcohol use, systolic blood pressure (SBP) and diastolic blood pressure (DBP) of all subjects. At every visit, height and weight were measured by a team of trained nurses twice in the morning during health examination. While weight was measured without heavy clothing and recorded to the nearest 100 g, height was measured without shoes and recorded to the nearest mm with a stadiometer. BMI was calculated as dividing the weight (kg) by the height squared (m<sup>2</sup>). Blood pressure was measured with an automatic instrument (Omron, model 705cp, Kyoto, Japan) at the brachial artery of the person in a seated position after they had at least fifteen-minute rest.

Blood samples were collected and analyzed from antecubital vein sampling. Laboratory parameters including fasting plasma glucose (FPG), triglyceride

(TG), total cholesterol (TC), high density lipoprotein-cholesterol (HDL-C), low density lipoprotein-cholesterol (LDL-C), alanine aminotransferase (ALT), aspartate aminotransferase (AST), alkaline phosphatase (AKP),  $\gamma$ -glutamyltransferase ( $\gamma$ -GT) and albumin (ALB) levels were subsequently analyzed by an automated analyzer (Abbott AxSYM, Park, IL). The 13 C-urea breath test was performed with an infrared spectrometer to identify *H. pylori* infection.

## Colonoscopy

Following the full bowel preparation with 4 L polyethylene glycol lavage solution, colonoscopy (OLYMPUS, Tokyo, Japan) was performed on each participant by endoscopists (graduate degrees or more) who had at least 5 years of experience in colonoscopic examination at the First Affiliated Hospital of Wenzhou Medical University. The diagnosis of colorectal polyp was established following the recommendation of the World

Health Organization (WHO). A macroscopic visible protrusion from the surface of the colorectal mucosa was considered to be a colorectal polyp [36]. The examination was regarded as complete only if an endoscope reached the caecum, otherwise it was regarded as incomplete, which was excluded from the analysis. The colonoscopic data including the location, size and number of polyps was described by professional endoscopists. The location was stratified as follows: (1) Polyps in the cecum, ascending and transverse colon were defined as proximal polyps; (2) Those in the splenic flexure, rectum, descending and sigmoid colon were considered distal polyps; (3) Polyps located on both sides were called bilateral polyps. The size of the polyps was divided into three groups: less than 5 mm, 5-9 mm and 10 mm or more. The number of polyps was also divided into three groups: one, two and three or more.

### NAFLD diagnosis

Fatty liver was diagnosed by professional technicians using abdominal ultrasonography, following the guidelines for the assessment and management of NAFLD in the Asia-Pacific region [37]. NAFLD was defined as the presence of fatty liver in the absence of the following: (1) Excess alcohol consumption (>140 g/week for men or >70 g/week for women); (2) Other etiologies of liver diseases (viral hepatitis, autoimmune liver disease, schistosomiasis, drug-induced liver disease, and cholestatic or metabolic liver disease); (3) History of hepatic cirrhosis and liver carcinoma [16].

### Smoking and metabolic-related indicators

Regardless of smoking at the time of the study or former smoking habits, individuals with cessation of less than one year were defined as smokers. In addition, the definition of metabolic-related indicators were defined as follows: (1) Obesity: BMI  $\geq 25$  in both genders; (2) Hypertension: SBP  $\geq 140$  mmHg and/or DBP  $\geq 90$  mmHg or previously diagnosed; (3) Hyperglycemia: FPG  $\geq 6.1$  mmol/L or previously diagnosed; (4) Dyslipidemia: TG  $\geq 2.26$  mmol/L (200 mg/dL) and/or TC  $\geq 6.22$  mmol/L (240 mg/dL) and/or HDL-C  $< 1.04$  mmol/L (40 mg/dL) and/or LDL-C  $\geq 4.14$  mmol/L (160 mg/dL) [38].

### Statistical analysis

Data analyses were performed using SPSS (SPSS version 23.0 for Windows), and continuous variables were expressed as the mean  $\pm$  standard deviation (SD). Student's t-test was used to compare significant differences between polyp-free group and colorectal polyps group. Univariate and multivariate logistic analyses were performed to determine the unadjusted association of clinical and laboratory parameters with prognosis. To further analyze the possible interactive effects of NAFLD

and smoking on the prevalence of colorectal polyps in men, individuals were divided into four groups: Q1: NAFLD (-)/smoking (-); Q2: NAFLD (+)/smoking (-); Q3: NAFLD (-)/smoking (+); Q4: NAFLD (+)/smoking (+), according to the different conditions of NAFLD and smoking. Multiple logistic regression analyses were used to analyze the possible effects of NAFLD and smoking on the prevalence of colorectal polyps in men after adjustment for confounding factors including age, obesity, hypertension, hyperglycemia, dyslipidemia and alcohol use. Then, stratified analyses were also performed to determine whether the association between NSM and colorectal polyps persisted in each subgroup (adenomatous polyp, non-adenomatous polyp, number, size and location) after adjusting for confounding factors. A two-sided P value of less than 0.05 was considered statistically significant, and each odds ratio (OR) was presented together with its 95% confidence interval (CI).

### Abbreviations

AKP: alkaline phosphatase; ALT: alanine aminotransferase; AST: aspartate aminotransferase; BMI: body mass index; CIs: confidence intervals; DBP: diastolic blood pressure; FPG: fasting plasma glucose; GATS: the Global Adult Tobacco Survey;  $\gamma$ -GT:  $\gamma$ -glutamyltransferase; HDL-C: high density lipoprotein-cholesterol; IGF: insulin-like growth factor; LDL-C: low density lipoprotein-cholesterol; MS: metabolic syndrome; NAFLD: non-alcoholic fatty liver disease; NASH CRN: non-alcoholic steatohepatitis clinical research network; NSM: NAFLD and smoking in men; OR: odds ratio; SBP: systolic blood pressure; SD: standard deviation; TC: total cholesterol; TG: triglyceride; WHO: World Health Organization.

### Author contributions

Chen QF, Zhou XD, Wu JS, Fang DH and Jin Y designed the study. Chen QF, Zhou XD, Sun YJ, Huang JH and Zhao Q collected the data. Chen QF and Zhou XD performed the statistical analyses. Chen QF, Zhou XD, Wu JS, Zhao Q, Jin Y and Fang DH reviewed the results, interpreted the data, and wrote the manuscript. All authors have made an intellectual contribution to the manuscript and approved submission.

### CONFLICTS OF INTEREST

The authors report no conflicts of interest.

### FUNDING

No financial support has been received.

## REFERENCES

1. Touzin NT, Bush KN, Williams CD, Harrison SA. Prevalence of colonic adenomas in patients with nonalcoholic fatty liver disease. *Therap Adv Gastroenterol.* 2011; 4:169-176.
2. Edwards BK, Brown ML, Wingo PA, Howe HL, Ward E, Ries LA, Schrag D, Jamison PM, Jemal A, Wu XC, Friedman C, Harlan L, Warren J, et al. Annual report to the nation on the status of cancer, 1975-2002, featuring population-based trends in cancer treatment. *J Natl Cancer Inst.* 2005; 97:1407-1427.
3. Byeon JS, Yang SK, Kim TI, Kim WH, Lau JY, Leung WK, Fujita R, Makharia GK, Abdullah M, Hilmi I, Sollano J, Yeoh KG, Wu DC, et al. Colorectal neoplasm in asymptomatic Asians: a prospective multinational multicenter colonoscopy survey. *Gastrointest Endosc.* 2007; 65:1015-1022.
4. Kim YJ, Lee KJ, Park SY, Han JH, Kwon KY, Kim JH. Association between dyslipidemia and the prevalence of colon polyps based on a health evaluation of subjects at a hospital. *Korean J Fam Med.* 2014; 35:143-151.
5. Sung JJ, Lau JY, Goh KL, Leung WK. Increasing incidence of colorectal cancer in Asia: implications for screening. *Lancet Oncol.* 2005; 6:871-876.
6. Huang HE, Yang YC, Wu JS, Wang RH, Lu FH, Chang CJ. The relationship between different glycemic statuses and colon polyps in a Taiwanese population. *J Gastroenterol.* 2014; 49:1145-1151.
7. Giovannucci E. Modifiable risk factors for colon cancer. *Gastroenterol Clin North Am.* 2002; 31:925-943.
8. Ono M. Molecular links between tumor angiogenesis and inflammation: inflammatory stimuli of macrophages and cancer cells as targets for therapeutic strategy. *Cancer Sci.* 2008; 99:1501-1506.
9. Paskett ED, Reeves KW, Pineau B, Albert PS, Caan B, Hasson M, Iber F, Kikendall JW, Lance P, Shike M, Slattery ML, Weissfeld J, Kahle L, et al. The association between cigarette smoking and colorectal polyp recurrence (United States). *Cancer Causes Control.* 2005; 16:1021-1033.
10. Lee HL, Son BK, Lee OY, Jeon YC, Han DS, Sohn JH, Yoon BC, Choi HS, Hahm JS, Lee MH, Lee DH, Kee CS. [Abdominal obesity, insulin resistance, and the risk of colonic adenoma]. [Article in Korean]. *Korean J Gastroenterol.* 2007; 49:147-151.
11. Cowey S, Hardy RW. The metabolic syndrome: a high-risk state for cancer? *Am J Pathol.* 2006; 169:1505-1522.
12. Aggarwal BB, Gehlot P. Inflammation and cancer: how friendly is the relationship for cancer patients? *Curr Opin Pharmacol.* 2009; 9:351-369.
13. Lee GE, Park HS, Yun KE, Jun SH, Kim HK, Cho SI, Kim JH. Association between BMI and metabolic syndrome and adenomatous colonic polyps in Korean men. *Obesity (Silver Spring).* 2008; 16:1434-1439.
14. Ji BT, Weissfeld JL, Chow WH, Huang WY, Schoen RE, Hayes RB. Tobacco smoking and colorectal hyperplastic and adenomatous polyps. *Cancer Epidemiol Biomarkers Prev.* 2006; 15:897-901.
15. Hofstad B, Almendingen K, Vatn M, Andersen SN, Owen RW, Larsen S, Osnes M. Growth and recurrence of colorectal polyps: a double-blind 3-year intervention with calcium and antioxidants. *Digestion.* 1998; 59:148-156.
16. Hwang ST, Cho YK, Park JH, Kim HJ, Park DI, Sohn CI, Jeon WK, Kim BI, Won KH, Jin W. Relationship of non-alcoholic fatty liver disease to colorectal adenomatous polyps. *J Gastroenterol Hepatol.* 2010; 25:562-567.
17. Huang KW, Leu HB, Wang YJ, Luo JC, Lin HC, Lee FY, Chan WL, Lin JK, Chang FY. Patients with nonalcoholic fatty liver disease have higher risk of colorectal adenoma after negative baseline colonoscopy. *Colorectal Dis.* 2013; 15:830-835.
18. Zein CO, Unalp A, Colvin R, Liu YC, McCullough AJ. Smoking and severity of hepatic fibrosis in nonalcoholic fatty liver disease. *J Hepatol.* 2011; 54:753-759.
19. Chiang PH, Chang TY, Chen JD. Synergistic effect of fatty liver and smoking on metabolic syndrome. *World J Gastroenterol.* 2009; 15:5334-5339.
20. Li Q, Hsia J, Yang G. Prevalence of smoking in China in 2010. *N Engl J Med.* 2011; 364:2469-2470.
21. Lee YI, Lim YS, Park HS. Colorectal neoplasms in relation to non-alcoholic fatty liver disease in Korean women: a retrospective cohort study. *J Gastroenterol Hepatol.* 2012; 27:91-95.
22. Botteri E, Iodice S, Raimondi S, Maisonneuve P, Lowenfels AB. Cigarette smoking and adenomatous polyps: a meta-analysis. *Gastroenterology.* 2008; 134:388-395.
23. Agarwal R. Smoking, oxidative stress and inflammation: impact on resting energy expenditure in diabetic nephropathy. *BMC Nephrol.* 2005; 6:13.
24. Malfertheiner P, Schutte K. Smoking--a trigger for chronic inflammation and cancer development in the pancreas. *Am J Gastroenterol.* 2006; 101:160-162.
25. Bailey SM, Mantena SK, Millender-Swain T, Cakir Y, Jhala NC, Chhieng D, Pinkerton KE, Ballinger SW. Ethanol and tobacco smoke increase hepatic steatosis and hypoxia in the hypercholesterolemic apoE(-/-) mouse: implications for a "multihit" hypothesis of fatty liver disease. *Free Radic Biol Med.* 2009; 46:928-938.
26. Bhattacharyya A, Chattopadhyay R, Mitra S, Crowe SE. Oxidative stress: an essential factor in the pathogenesis of gastrointestinal mucosal diseases. *Physiol Rev.* 2014; 94:329-354.
27. Oruc N, Ozutemiz O, Yuce G, Akarca US, Ersoz G, Gunsar F, Batur Y. Serum procalcitonin and CRP levels in non-alcoholic fatty liver disease: a case control study. *BMC Gastroenterol.* 2009; 9:16.
28. Hickman IJ, Sullivan CM, Flight S, Campbell C, Crawford DH, Masci PP, O'Moore-Sullivan TM, Prins JB, Macdonald



- GA. Altered clot kinetics in patients with non-alcoholic fatty liver disease. *Ann Hepatol.* 2009; 8:331-338.
29. Kim S, Keku TO, Martin C, Galanko J, Woosley JT, Schroeder JC, Satia JA, Halabi S, Sandler RS. Circulating levels of inflammatory cytokines and risk of colorectal adenomas. *Cancer Res.* 2008; 68:323-328.
  30. Volkova E, Willis JA, Wells JE, Robinson BA, Dachs GU, Currie MJ. Association of angiopoietin-2, C-reactive protein and markers of obesity and insulin resistance with survival outcome in colorectal cancer. *Br J Cancer.* 2011; 104:51-59.
  31. Keku TO, Lund PK, Galanko J, Simmons JG, Woosley JT, Sandler RS. Insulin resistance, apoptosis, and colorectal adenoma risk. *Cancer Epidemiol Biomarkers Prev.* 2005; 14:2076-2081.
  32. Nakanishi N, Takatorige T, Suzuki K. Cigarette smoking and the risk of the metabolic syndrome in middle-aged Japanese male office workers. *Ind Health.* 2005; 43:295-301.
  33. Giovannucci E. Insulin, insulin-like growth factors and colon cancer: a review of the evidence. *J Nutr.* 2001; 131:3109s-3120s.
  34. Probst-Hensch NM, Yuan JM, Stanczyk FZ, Gao YT, Ross RK, Yu MC. IGF-1, IGF-2 and IGFBP-3 in prediagnostic serum: association with colorectal cancer in a cohort of Chinese men in Shanghai. *Br J Cancer.* 2001; 85:1695-1699.
  35. Mendler MH, Bouillet P, Le Sidaner A, Lavoine E, Labrousse F, Sautereau D, Pillegand B. Dual-energy CT in the diagnosis and quantification of fatty liver: limited clinical value in comparison to ultrasound scan and single-energy CT, with special reference to iron overload. *J Hepatol.* 1998; 28:785-794.
  36. Reinacher-Schick A, Schmiegel W. Surveillance strategies in patients after polypectomy. *Dig Dis.* 2002; 20:61-69.
  37. Chitturi S, Farrell GC, Hashimoto E, Saibara T, Lau GK, Sollano JD. Non-alcoholic fatty liver disease in the Asia-Pacific region: definitions and overview of proposed guidelines. *J Gastroenterol Hepatol.* 2007; 22:778-787.
  38. Joint Committee for Developing Chinese guidelines on Prevention and Treatment of Dyslipidemia in Adults. [Chinese guidelines on prevention and treatment of dyslipidemia in adults]. [Article in Chinese]. *Zhonghua Xin Xue Guan Bing Za Zhi.* 2007; 35:390-419.
